# Supplementary material for: One-pot self-assembled bimetallic sulfide particle cluster-supported three-dimensional graphene aerogel as an efficient electrocatalyst for the oxygen evolution reaction
Source: Royal Society of Chemistry journal article supplement (doi:10.1039/d3cp02041j), 2023-01-01
Supplement: d3cp02041j1.pdf [file d3cp02041j1.pdf]

**One-pot self-assembled bimetallic sulfide nanoparticle  
cluster supported three-dimensional graphene aerogel as  
efficient electrocatalysts for oxygen reduction reaction**

Jianzhi Wang, Yu Luo, Jiwei Wang, Hongliang Yu, Ziyi Guo, Jie Yang, Yanan Xue, Ning Cai, Hui  
Li\*, Faquan Yu\*

Key Laboratory for Green Chemical Process of Ministry of Education,  
Hubei Key Laboratory for Novel Reactor and Green Chemistry Technology  
Hubei Engineering Research Center for Advanced Fine Chemicals  
School of Chemical Engineering and Pharmacy,  
Wuhan Institute of Technology, Wuhan 430073, China

\*Corresponding author:

Faquan Yu, Professor, PhD

Wuhan Institute of Technology

LiuFang Campus, No.206, Guanggu 1st road, Wuhan 430205, Hubei, China

E-mail address: [sodium2008@163.com](mailto:sodium2008@163.com); [fyu@wit.edu.cn](mailto:fyu@wit.edu.cn)

Tel: (86-27) 87194980; Fax: (86-27) 87194465

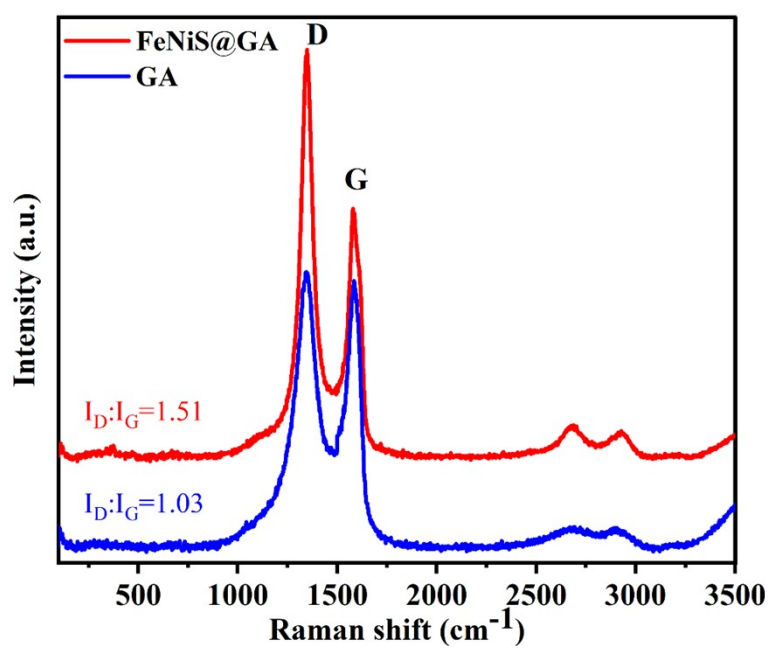

**Figure S1.** Raman spectrum of FeNiS@GA and GA.

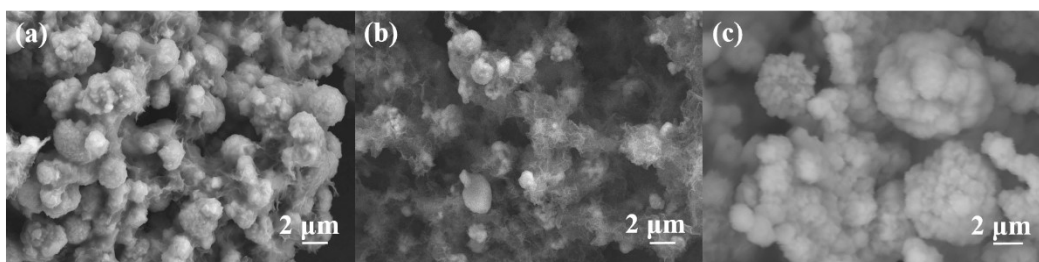

**Figure S2.** SEM images of NiS<sub>2</sub>@GA, FeS<sub>2</sub>@GA and FeNiS.

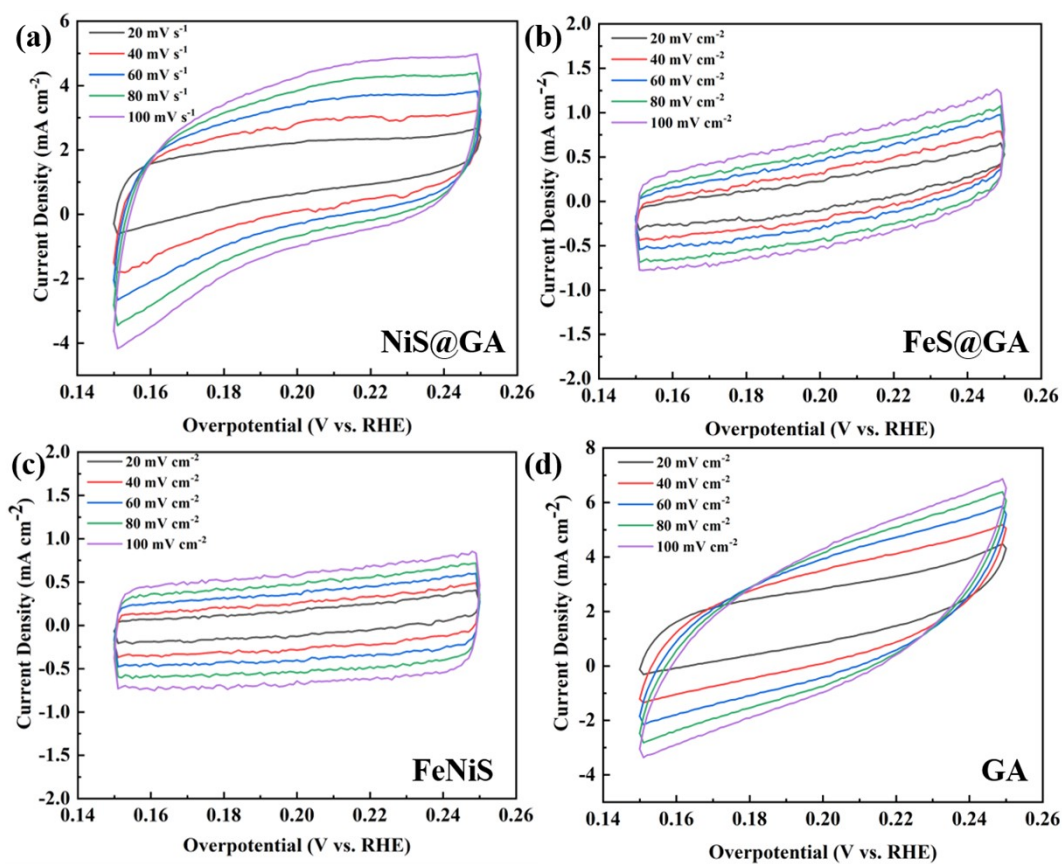

**Figure S3.** CV curves of NiS@GA (a), FeS@GA (b), FeNiS (c) and GA (d) at different scan rates from 10 mV s<sup>-1</sup> to 100 mV s<sup>-1</sup>.

**Table S1.** Comparison of the OER catalytic performance of FeNiS@GA with those of other Fe-based and Ni-based catalysts.

| Catalysts                                                  | Current density<br>(mA·cm <sup>-2</sup> ) | Overpotential<br>(mV) | Electrolyte | Ref.      |
|------------------------------------------------------------|-------------------------------------------|-----------------------|-------------|-----------|
| FeNiS@GA                                                   | 10                                        | 276                   | 1 M KOH     | This work |
| FeNi <sub>3</sub> /MnFe <sub>2</sub> O <sub>4</sub> /N-RGO | 10                                        | 341                   | 1 M KOH     | 1         |
| MoxC-FeNi@NC                                               | 10                                        | 306                   | 1 M KOH     | 2         |
| FeNi/PNG                                                   | 10                                        | 353                   | 1 M KOH     | 3         |
| FeNi@NC                                                    | 10                                        | 298                   | 1 M KOH     | 4         |
| NiFe-LDH-0.4M HMS                                          | 10                                        | 290                   | 1 M KOH     | 5         |
| Br-Ni-MOF                                                  | 10                                        | 306                   | 1 M KOH     | 6         |
| NP/NiO                                                     | 10                                        | 332                   | 1 M KOH     | 7         |
| NiFe-Se/CFP                                                | 10                                        | 281                   | 1 M KOH     | 8         |
| NiCo-1.0Fe                                                 | 10                                        | 285                   | 1 M KOH     | 9         |
| NiCo-2.0-800HP                                             | 10                                        | 320                   | 1 M KOH     | 10        |

## Reference

1. Jia, X.; Zhang, Y.; Zhang, L.; Wang, L.; Zhou, L., Fabrication and bifunctional electrocatalytic performance of FeNi<sub>3</sub>/MnFe<sub>2</sub>O<sub>4</sub>/nitrogen-doping reduced graphene oxide nanocomposite for oxygen electrocatalytic reactions. *Ionics* **2019**, *26* (2), 991-1001.
2. Liu, Z.; Ma, Y.; Gu, W.; Yuan, C.; Teng, F., Facile synthesis of MoxC-FeNi@NC with an OER activity superior to RuO<sub>2</sub> and IrO<sub>2</sub>/C. *Journal of Physics and Chemistry of Solids* **2020**, *147*: 109578.
3. Wang, H.; Feng, X.; Zhou, M.; Bo, X.; Guo, L., FeNi Nanoparticles Embedded in Porous Nitrogen-Doped Graphene for Electrocatalytic Evolution of Hydrogen and Oxygen. *ACS Applied Nano Materials* **2020**, *3* (7), 6336-6343.
4. Zhang, X.; Chen, Y.; Wang, B.; Chen, M.; Yu, B.; Wang, X.; Zhang, W.; Yang, D., FeNi nanoparticles embedded porous nitrogen-doped nanocarbon as efficient electrocatalyst for oxygen evolution reaction. *Electrochimica Acta* **2019**, *321*: 134720.
5. Zhong, H.; Liu, T.; Zhang, S.; Li, D.; Tang, P.; Alonso-Vante, N.; Feng, Y., Template-free synthesis of three-dimensional NiFe-LDH hollow microsphere with enhanced OER performance in alkaline media. *Journal of Energy Chemistry* **2019**, *33*, 130-137.
6. Cheng, W.; Xi, S.; Wu, Z. P.; Luan, D.; Lou, X. W. D., In situ activation of Br-confined Ni-based metal-organic framework hollow prisms toward efficient electrochemical oxygen evolution. *Science Advances* **2021**, *7*, eabk0919.
7. Bhanja, P.; Kim, Y.; Paul, B.; Kaneti, Y. V.; Alothman, A. A.; Bhaumik, A.; Yamauchi, Y., Microporous nickel phosphonate derived heteroatom doped nickel oxide and nickel phosphide: Efficient electrocatalysts for oxygen evolution reaction. *Chemical Engineering Journal* **2021**, *405*: 126803.
8. Guo, Y.; Zhang, C.; Zhang, J.; Dastafkan, K.; Wang, K.; Zhao, C.; Shi, Z., Metal–Organic Framework-Derived Bimetallic NiFe Selenide Electrocatalysts with Multiple Phases for Efficient Oxygen Evolution Reaction. *ACS Sustainable Chemistry & Engineering* **2021**, *9* (5), 2047-2056.
9. Septiani, N. L. W.; Kaneti, Y. V.; Guo, Y.; Yulianto, B.; Jiang, X.; Ide, Y.; Nugraha, N.; Dipojono, H. K.; Yu, A.; Sugahara, Y.; Golberg, D.; Yamauchi, Y., Holey Assembly of Two-Dimensional Iron-Doped Nickel-Cobalt Layered Double Hydroxide Nanosheets for Energy Conversion Application. *ChemSusChem* **2020**, *13* (6), 1645-1655.
10. Septiani, N. L. W.; Kaneti, Y. V.; Fathoni, K. B.; Guo, Y.; Ide, Y.; Yulianto, B.; Jiang, X.; Nugraha; Dipojono, H. K.; Golberg, D.; Yamauchi, Y., Tailorable nanoarchitecturing of bimetallic nickel–cobalt hydrogen phosphate via the self-weaving of nanotubes for efficient oxygen evolution. *Journal of Materials Chemistry A* **2020**, *8* (6), 3035-3047.
